1 **Title**

2 Generation of human bronchial organoids for SARS-CoV-2 research

3

4 **Authors/Affiliations**

5 Tatsuya Suzuki<sup>1</sup>

6 Yumi Itoh<sup>1</sup>

7 Yusuke Sakai<sup>2</sup>

8 Akatsuki Saito<sup>3</sup>

9 Daisuke Okuzaki<sup>4,5,6</sup>

10 Daisuke Motooka<sup>7</sup>

11 Shohei Minami<sup>8</sup>

12 Takeshi Kobayashi<sup>8</sup>

13 Takuya Yamamoto<sup>9,10,11,12</sup>

14 Toru Okamoto<sup>1\*</sup>

15 Kazuo Takayama<sup>12\*</sup>

16

17 <sup>1</sup> Institute for Advanced Co-Creation Studies, Research Institute for Microbial Diseases,

18 Osaka University, Suita 565-0871, Japan

19 <sup>2</sup> Laboratory of Veterinary Pathology, Joint Faculty of Veterinary Medicine, Yamaguchi

20 University, Yamaguchi 753-8511, Japan

21 <sup>3</sup> Department of Veterinary Science, Faculty of Agriculture, University of Miyazaki,

22 Miyazaki 889-2192, Japan

23 <sup>4</sup> Genome Information Research Center, Research Institute for Microbial Diseases,

24 Osaka University, Suita 565-0871, Japan

25 <sup>5</sup> Single Cell Genomics, Human Immunology, WPI Immunology Frontier Research  
26 Center, Osaka University, Suita 565-0871, Japan

27 <sup>6</sup> Institute for Open and Transdisciplinary Research Initiatives, Osaka University, Suita  
28 565-0871, Japan

29 <sup>7</sup> Genome Information Research Center, Research Institute for Microbial Diseases,  
30 Osaka University, Suita 565-0871, Japan

31 <sup>8</sup> Laboratory of Viral Replication, International Research Center for Infectious Diseases,  
32 Research Institute for Microbial Diseases, Osaka University, Suita, Osaka, 565-0871  
33 Japan

34 <sup>9</sup> Institute for the Advanced Study of Human Biology (WPI-ASHBi), Kyoto University,  
35 Kyoto 606-8501 Japan

36 <sup>10</sup> Medical-risk Avoidance based on iPS Cells Team, RIKEN Center for Advanced  
37 Intelligence Project (AIP), Kyoto 606-8507, Japan

38 <sup>11</sup> AMED-CREST, Japan Agency for Medical Research and Development (AMED),  
39 Tokyo 100-0004, Japan

40 <sup>12</sup> Center for iPS Cell Research and Application (CiRA), Kyoto University, Kyoto  
41 606-8507, Japan

42

43 **\*Corresponding author**

44 Dr. Kazuo Takayama

45 Center for iPS Cell Research and Application, Kyoto University, Shogoin Kawaharacho  
46 53, Sakyo-ku, Kyoto 606-8397, Japan

47 Phone: +81-75-366-7362, FAX: +81-75-366-7074

48 E-mail: [kazuo.takayama@cira.kyoto-u.ac.jp](mailto:kazuo.takayama@cira.kyoto-u.ac.jp)

49

50 Dr. Toru Okamoto

51 Institute for Advanced Co-Creation Studies, Research Institute for Microbial Diseases,

52 Osaka University, Yamadaoka 3-1, Suita 565-0871, Japan

53 Phone: +81-6-6879-8330, FAX: +81-6-6879-8330

54 E-mail: [toru@biken.osaka-u.ac.jp](mailto:toru@biken.osaka-u.ac.jp)

55

## 56 **Abbreviations**

57 2D two-dimensional

58 ACE2 angiotensin-converting enzyme 2

59 CC10 club cell protein 10

60 FGF fibroblast growth factor

61 hBEpC human bronchial epithelial cells

62 hBO human bronchial organoids

63 IFN-I type I interferon

64 IHC immunohistochemistry

65 KRT5 keratin 5

66 LDH lactate dehydrogenase

67 PSC pluripotent stem cell

68 RdRp RNA-dependent RNA polymerase

69 RNA seq RNA sequencing

70 SARS-CoV-2 severe acute respiratory syndrome coronavirus 2

71 TMPRSS2 transmembrane serine proteinase 2

72 WHO World Health Organization

73

74 **Abstract**

75        Coronavirus disease 2019 (COVID-19) is a disease that causes fatal disorders  
76 including severe pneumonia. To develop a therapeutic drug for COVID-19, a model that  
77 can reproduce the viral life cycle and evaluate the drug efficacy of anti-viral drugs is  
78 essential. In this study, we established a method to generate human bronchial organoids  
79 (hBO) from commercially available cryopreserved human bronchial epithelial cells and  
80 examined whether they could be used as a model for severe acute respiratory syndrome  
81 coronavirus 2 (SARS-CoV-2) research. Our hBO contain basal, club, ciliated, and  
82 goblet cells. Angiotensin-converting enzyme 2 (ACE2), which is a receptor for  
83 SARS-CoV-2, and transmembrane serine proteinase 2 (TMPRSS2), which is an  
84 essential serine protease for priming spike (S) protein of SARS-CoV-2, were highly  
85 expressed. After SARS-CoV-2 infection, not only the intracellular viral genome, but  
86 also progeny virus, cytotoxicity, pyknotic cells, and moderate increases of the type I  
87 interferon signal could be observed. Treatment with camostat, an inhibitor of TMPRSS2,  
88 reduced the viral copy number to 2% of the control group. Furthermore, the gene  
89 expression profile in SARS-CoV-2-infected hBO was obtained by performing RNA-seq  
90 analysis. In conclusion, we succeeded in generating hBO that can be used for  
91 SARS-CoV-2 research and COVID-19 drug discovery.

92

93

94 **Graphical abstract**

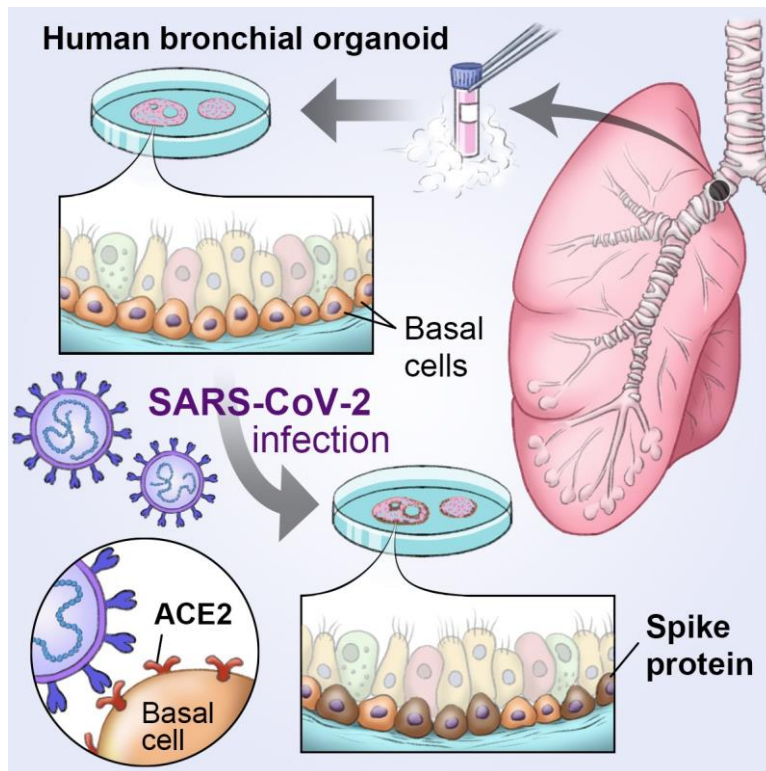

95

96

97 **Key words**

98 SARS-CoV-2, bronchial organoids, COVID-19, camostat

99

100

## 101 **Introduction**

102       The “2019-new coronavirus disease (COVID-19) was first reported in China in  
103 December 2019 <sup>1</sup> and declared a pandemic by the WHO in March 2020 <sup>2</sup>. Severe  
104 pneumonia is most frequently observed in COVID-19 patients, and the number of  
105 COVID-19 patients and deaths are still increasing. These conditions have made it  
106 difficult for research on severe acute respiratory syndrome coronavirus 2  
107 (SARS-CoV-2), which is the causative virus of COVID-19, to keep pace. SARS-CoV-2  
108 is composed of four proteins: S (spike), E (envelope), M (membrane), and N  
109 (nucleocapsid) proteins. It is known that angiotensin-converting enzyme 2 (ACE2) is a  
110 SARS-CoV-2 receptor, and transmembrane serine proteinase 2 (TMPRSS2) is essential  
111 for priming S protein <sup>3</sup>. Thus, to accelerate SARS-CoV-2 research, a novel lung model  
112 that reproduces the viral life cycle with intact expression of these host factors is  
113 indispensable.

114       A number of animal and cell models that can be used for SARS-CoV-2 research  
115 have been reported (Takayama et al., in revision), but an *in vitro* lung model that can  
116 evaluate candidate therapeutic agents for COVID-19 is essential for conducting  
117 large-scale drug screening. Human lung organoids are excellent tools that can faithfully  
118 mimic the lung functions of living organisms <sup>4</sup>. The lungs consist of bronchi and alveoli.  
119 Lukassen et al. have performed single-cell analysis of alveoli and bronchi and reported  
120 that ACE2 is predominantly expressed in the transient secretory cell type, which  
121 displays a transient cell state between goblet and ciliated cells, in bronchi, but  
122 TMPRSS2 is strongly expressed in both lung tissues <sup>5</sup>. Therefore, a bronchial organoid  
123 containing transient secretory, goblet, and ciliated cells could be a useful model for

124 SARS-CoV-2 research.

125         Several reports have verified the usefulness of two-dimensional (2D) culturing  
126 airway epithelial cells in SARS-CoV2 studies. For example, SARS-CoV-2 infection  
127 experiments using human bronchial epithelial cells (hBEpC) showed cytopathic effects  
128 96 hr after the infection on the layers of human airway epithelial cells <sup>6</sup>. In addition,  
129 hBEpC cultured using an air-liquid interface culture system can be used to evaluate  
130 viral infection, replication, and the drug efficacy of remdesivir <sup>7</sup>. 2D culture systems of  
131 hBEpC are relatively easy to use, but they cannot reproduce the cellular  
132 microenvironment in the living body and are difficult to use for long-time culture.  
133 Recently, it was shown that SARS-CoV-2 can infect and replicate in human pluripotent  
134 stem cell (PSC)-derived lung organoids containing bronchial epithelial cells and  
135 alveolar epithelial cells <sup>8</sup>. However, these organoids exhibit a fetal phenotype rather than  
136 an adult type <sup>9,10</sup>. Adult-type bronchial organoids are essential because of the severe  
137 infection caused by COVID-19 in adults. Human bronchial organoids (hBO) with adult  
138 phenotype can be established from intact human lung tissue <sup>11</sup>. However, it is difficult  
139 for many researchers to obtain an intact lung biopsy sample, because the process  
140 requires the approval of an ethics committee and informed consent from the donor.  
141 Therefore, in this study, we developed a method for generating hBO from commercially  
142 available cryopreserved adult hBEpC and applied it to SARS-CoV-2 research.

143

## 144 **Results**

### 145 **Generation of human bronchial organoids from cryopreserved adult bronchial** 146 **epithelial cells**

147         We searched for the conditions that could establish hBO from cryopreserved adult

148 hBEpC. We found that after embedding the hBEpC in Matrigel and culturing with  
149 advanced DMEM/F12 medium containing FGF2, FGF7, FGF10, Noggin, R-spondin 1,  
150 Y-27632, and SB202190 (expansion medium), hBO could be established (**Table S1**).  
151 Furthermore, we could mature the hBO by culturing them with advanced DMEM/F12  
152 medium containing FGF2, FGF7, FGF10, Y-27632, and A83-01 (differentiation  
153 medium) (**Table S1**). Among the growth factors included in the differentiation medium,  
154 FGF2 is important for enhancing the expression levels of *ACE2* and *TMPRSS2* (**Fig. S1**).  
155 Approximately 100 hBO were present in 50  $\mu$ L of Matrigel, and the diameter of each  
156 hBO was around 100-200  $\mu$ m (**Fig. 1A**). Transmission electron microscopy (TEM)  
157 images showed the presence of cilia and goblet cells (**Fig. 1B, Fig. S2**). The *ACE2* and  
158 *TMPRSS2* expression levels in hBO were higher than in cryopreserved adult hBEpC  
159 (**Fig. 1C**). Immunohistochemical analysis showed that ACE2 was expressed in part of  
160 the outer edge of hBO, while TMPRSS2 was expressed in part of the outer edge and  
161 lumen (**Fig. 1D, Fig. S3**). Because bronchi are composed of basal, ciliated, goblet, and  
162 club cells, a gene expression analysis of markers specific to these four cell types was  
163 performed. The gene expression levels of basal, ciliated, goblet, and club cell markers in  
164 hBO were higher than in cryopreserved adult hBEpC (**Figs. 1E-1H**). Consistently, hBO  
165 were also positive for  $\alpha$ -tubulin, CC10, mucin 5AC, and KRT5 (**Fig. 1I**). The outer edge  
166 and lumen of hBO was positive for KRT5 and acetylated  $\alpha$ -tubulin, respectively. These  
167 results suggest that basal cells are positive for both ACE2 and TMPRSS2, but ciliated  
168 cells are positive only for TMPRSS2. Based on these observations, we succeeded in  
169 generating expandable and functional hBO from cryopreserved adult hBEpC.

170

171 **RNA-seq analysis of human bronchial organoids**



172 RNA-seq analysis was performed to further characterize hBO. A heat map,  
173 principal component analysis (PCA), and scatter plot of gene expression profiles all  
174 show hBO is closer to hBEpC than to A549 cells (**Figs. 2A-2C**). A second heat map of  
175 bronchial epithelial markers showed that hBO expressed bronchial epithelial markers  
176 more strongly than did hBEpC or A549 cells (**Fig. 2D**). These results suggest that hBO  
177 have higher bronchial functions than A549 cells or hBEpC.

178

### 179 **SARS-CoV-2 infection experiments using human bronchial organoids**

180 Next, we investigated whether hBO can be applied to SARS-CoV-2 research.  
181 HBO were infected with SARS-CoV-2 and then cultured in differentiation medium for  
182 5 days (**Fig. 3A**). We observed a significant accumulation of LDH in the culture  
183 medium of infected hBO (**Fig. 3B**), suggesting that cytotoxicity was caused by the  
184 infection. At day 5 after the infection, viral gene expression in infected hBO was clearly  
185 detected (**Fig. 3C**). IHC analysis showed that S protein-positive cells were observed in  
186 part of the outer edge of hBO (**Fig. 3D**). In addition, S protein co-localized with KRT5  
187 (**Fig. 3E**), but not with CC10 (**Fig. S4**), suggesting that SARS-CoV-2 infected and  
188 replicated in basal cells. Overall, these results indicate that SARS-CoV-2 can infect and  
189 replicate in hBO.

190 Currently, clinical trials using camostat, favipiravir, nafamostat, chloroquine,  
191 ritonavir/lopinavir, and remdesivir are underway around the world to develop  
192 therapeutic agents for COVID-19. However, the evaluation of these drugs using *in vitro*  
193 lung models is rare. Therefore, in this study, the effect of camostat, an inhibitor of  
194 TMPRSS2, was examined using our hBO because camostat was demonstrated as a  
195 promising candidate in cell culture models<sup>3</sup>. Upon camostat treatment, the amount of

196 SARS-CoV-2 viral genome was reduced to 2% of untreated infected hBO (**Fig. 3C**). In  
197 addition, LDH release from infected hBO was significantly reduced after camostat  
198 treatment (**Fig. 3B**). Finally, we examined the culture supernatants of infected hBO. We  
199 found that infectious virus was significantly observed in infected hBO, but the  
200 production of infectious virus was impaired by treatment with camostat (**Fig. 3F**).  
201 Collectively, our data indicated that hBO can secrete infectious virus into the culture  
202 medium, suggesting that our hBO system can investigate the entire life cycle of  
203 SARS-CoV-2.

204 Next, we examined the pathological effects of the SARS-CoV-2 infection. We  
205 observed that the number of pyknotic cells seemed to increase with the infection (**Fig.**  
206 **3G**). In addition, the expression levels of type I IFN (IFN-I) and IFN-stimulated genes  
207 were moderately increased after SARS-CoV-2 infection (**Fig. S5A**). Furthermore,  
208 SARS-CoV-2 infection did not change the gene expression levels of *ACE2* or *TMPRSS2*  
209 (**Fig. S5B**). From the above, these results suggest that hBO can be used to reproduce  
210 SARS-CoV-2-induced pulmonary disorder and to evaluate the effect of therapeutic  
211 agents.

212

### 213 **RNA-seq analysis of SARS-CoV-2-infected human bronchial organoids**

214 RNA-seq analysis was performed to investigate the effects of SARS-CoV-2  
215 infection and camostat treatment in detail. A heat map shows that the gene expression  
216 profile of SARS-CoV-2-infected hBO is closer to SARS-CoV-2-infected hBO treated  
217 with camostat than uninfected hBO (**Fig. 4A**). A PCA and scatter plot of the gene  
218 expressions agree with this finding (**Figs. 4B, C**). Additionally, SARS-CoV-2 infection  
219 increased the expression levels of IFN-I signaling-related genes in hBO (**Fig. 4D**).

220 PGSEA applied on GO biological process gene sets shows that the expression levels of  
221 genes involved in positive regulation of immune effector process, regulation of  
222 inflammatory response, interferon-gamma production, and positive regulation of acute  
223 inflammatory response were increased by SARS-CoV-2 infection and that this increase  
224 was suppressed by camostat treatment (**Fig. 4E**). These results indicated that  
225 SARS-CoV-2 infection induces IFN-I signaling-related genes and that camostat  
226 treatment reversed this phenotype.

227

## 228 **Discussion**

229 In this study, we succeeded in generating hBO from cryopreserved adult hBEpC  
230 and applied it to SARS-CoV-2 research. We confirmed that SARS-CoV-2 could infect  
231 and replicate in these cells and that camostat could suppress the replication. If small  
232 airway organoids and alveolar organoids can be produced from cryopreserved adult  
233 human small airway epithelial cells and alveolar epithelial cells, respectively, the  
234 infection and replication of SARS-CoV-2 in each part of the lung can be evaluated.  
235 Recently, it was shown that SARS-CoV-2 infection and replication can be observed in  
236 kidney<sup>12</sup>, liver ductal<sup>13</sup>, and gut organoids<sup>14</sup>. By comparing the infection and  
237 replication ability of SARS-CoV-2 in these organoids, the sensitivity of SARS-CoV-2  
238 in each organ could be compared.

239 The incorporation of mechanical stress into our organoid system could improve  
240 the accuracy of SARS-CoV-2 research. The human airway is always exposed to shear  
241 stress due to air flow. It has been reported that a functional *in vitro* lung model can be  
242 generated using a device capable of medium perfusion and expansion/contraction  
243 (organ-on-a-chip)<sup>15</sup>. Recently, it was reported that the infection and replication of

244 SARS-CoV-2 can be observed by culturing primary human lung airway epithelial basal  
245 stem cells and pulmonary microvascular endothelial cells on a chip device<sup>16</sup>. By  
246 applying our hBO to a similar device, we may be able to construct an *in vitro* bronchi  
247 model that more closely mimics the living body.

248         Nevertheless, even in its current condition, we used our hBO to evaluate the  
249 efficacy of a COVID-19 therapeutic agent and observe the cytotoxicity and innate  
250 immune responses caused by the SARS-CoV-2. Moreover, we could clarify the  
251 localization of SARS-CoV-2 in the hBO. These results could be obtained because hBO  
252 reproduce the cell populations and functions of the bronchi. Our data of RNA-seq  
253 analysis would give us a change to understand the virus affects cellular and bronchial  
254 functions.

255         Finally, we showed that camostat has a positive effect against COVID-19  
256 infection in hBO, demonstrating its usefulness for COVID-19 drug discovery. Similar  
257 studies on experimental COVID-19 drugs including those currently undergoing clinical  
258 trials should be considered. Furthermore, because hBO can be generated from  
259 commercially available cryopreserved hBEpC quickly (10 days) and at large scale, we  
260 expect hBO will shorten the search for effective COVID-19 agents.

261

262 **Materials and Methods**

263

264 **Human bronchial organoid culture**

265 Normal human bronchial epithelial cells (hBEpC, Lonza) were suspended in 10  
266 mg/ml cold Matrigel growth factor reduced (GFR) basement membrane matrix. 50  $\mu$ L  
267 drops of cell suspension were solidified on pre-warmed Nunc cell-culture treated  
268 multidishes (24-well plate) at 37°C for 10 min, and then 500  $\mu$ L of expansion medium  
269 (composition is shown in **Table S1**) was added to each well. The expansion medium  
270 was changed every 2 days. HBO were passaged every 10-12 days. For passaging, the  
271 hBO were suspended in 1 mL of 0.5 mM EDTA/PBS (Nacalai tesque) and mechanically  
272 sheared using a P1000 pipette tip. Then, 2 mL TrypLE Select (Thermo Fisher Scientific)  
273 was added to the suspension. After incubating for 5 min at room temperature, the hBO  
274 were again mechanically sheared using a P1000 pipette tip. 7 mL of expansion medium  
275 was added, and the organoid suspension tubes were centrifuged at 400 rpm. Organoid  
276 fragments were re-suspended in cold expansion medium and seeded as above. HBO  
277 were passaged every 10 days. To mature the hBO, the expanded hBO were cultured  
278 with differentiation medium (composition is shown in **Table S1**) for 5 days. HBO can  
279 be cryopreserved by using STEM-CELLBANKER GMP grade (TaKaRa Bio).

280

281 **A549 culture**

282 A549 cells were cultured with Ham's F12 medium (Thermo Fisher Scientific)  
283 containing 10% FBS, 1 $\times$ GlutaMAX (Thermo Fisher Scientific), and  
284 penicillin-streptomycin. A549 cells were passaged every 4 days.

285

## 286 **SARS-CoV-2 preparation**

287       The SARS-CoV-2 strain used in this study (SARS-CoV-2/Hu/DP/Kng/19-020)  
288 was obtained from the Kanagawa Prefectural Institute of Public Health. SARS-CoV-2  
289 was isolated from a COVID-19 patient in Japan (GenBank: LC528232.1). The isolation  
290 and analysis of the virus will be described elsewhere (manuscript in preparation). The  
291 virus was plaque-purified and propagated in Vero E6 cells. SARS-CoV-2 was stored at  
292 -80°C. All experiments including virus infections were done in the biosafety level  
293 facility at Osaka University strictly following regulations.

294

## 295 **SARS-CoV-2 infection and drug treatment**

296       Approximately 100 organoids were infected with  $5.0 \times 10^4$  PFU of SARS-CoV-2  
297 in a 24-well plate containing 500  $\mu$ L differentiation medium. One-half of the  
298 differentiation medium containing SARS-CoV-2 was replaced with fresh differentiation  
299 medium every day. At 5 days after the infection, the hBO and their supernatant were  
300 collected. In the drug treatment experiments, the infected hBO were cultured with  
301 differentiation medium containing 10  $\mu$ M camostat (Sigma-Aldrich) for 5 days.

302

## 303 **SARS-CoV-2 virus plaque assays**

304       VeroE6/TMPRSS2 cells (JCRB1819, JCRB Cell Bank)<sup>17</sup> were seeded on 12 well  
305 plates ( $1.7 \times 10^5$  cells/well) and incubated for 24 hr. The culture supernatants serially  
306 diluted by medium were inoculated and incubated for 2 hr. Culture medium was  
307 removed, fresh medium containing 1% methylcellulose (1.5mL) was added, and the  
308 culture was further incubated for 3 days. The cells were fixed with 4%  
309 Paraformaldehyde Phosphate Buffer Solution (Nacalai Tesque) and plaques were

310 visualized by using a Crystal violet.

311

### 312 **Quantitative PCR**

313 Total RNA was isolated from hBO using ISOGENE II (NIPPON GENE). cDNA  
314 was synthesized using 500 ng of total RNA with a Superscript VILO cDNA synthesis  
315 kit (Thermo Fisher Scientific). Real-time RT-PCR was performed with the SYBR Green  
316 PCR Master Mix (Applied Biosystems) using a StepOnePlus real-time PCR system  
317 (Applied Biosystems). The relative quantitation of target mRNA levels was performed  
318 by using the  $2^{-\Delta\Delta CT}$  method. The values were normalized by those of the  
319 housekeeping gene, *glyceraldehyde 3-phosphate dehydrogenase (GAPDH)*. The PCR  
320 primer sequences are shown in **Table S2**.

321 The SARS-CoV-2 primer and probe sets were obtained from Integrated DNA  
322 Technologies (IDT, 10006606).

323

### 324 **Ultrathin section transmission electron microscopy (TEM)**

325 HBO fixed in phosphate buffered 2% glutaraldehyde, and subsequently post-fixed  
326 in 2% osmium tetra-oxide for 2 hr at 4°C. After fixation, they were dehydrated in a  
327 graded series of ethanol and embedded in the epoxy resin. Ultrathin sections were cut  
328 and then stained with uranyl acetate and lead staining solution and were examined using  
329 an electron microscope (HITACHI H-7600) at 100 kV.

330

### 331 **Histopathology and immunofluorescence**

332 Fixed bronchial organoid samples were processed and embedded in paraffin.  
333 Then they were cut into 2  $\mu$ m-thick sections. The sections were deparaffinized,

334 rehydrated, and stained with hematoxylin and eosin (HE). The sections were then  
335 examined using a microscope (BX53 microscope with DP73 camera, Olympus  
336 Corporation).

337 For the immunohistochemical stain assay, the formalin-fixed and  
338 paraffin-embedded bronchial organoid samples were treated with pH 6.0 citrate buffer  
339 for 30 sec at 125°C in a pressure cooker (Dako Japan) as antigen retrieval. Sections  
340 were incubated with each antibody (**Table S3**), followed by Histofine Simple Stain  
341 MAX-PO (Nichirei Biosciences). The sections were visualized using Peroxidase Stain  
342 DAB Kit (Nacalai Tesque) before counterstaining with Meyer's hematoxylin.

343 For the double immunofluorescence staining assay, the sections were  
344 deparaffinized and subjected to antigen retrieval by treating them with 0.5% trypsin for  
345 30 min. Then the sections were blocked by 5% skim milk with albumin obtained from  
346 Bovine Serum Cohn Fraction V, pH 7.0 (Wako Pure Chemical Industries), in PBS for 30  
347 min at room temperature to avoid non-specific reactions. The sections were then  
348 incubated with primary antibody (**Table S3**) overnight at 4°C, washed, and incubated  
349 with secondary antibody (**Table S3**) for 1 h at room temperature. After washing with  
350 PBS, the specimens were mounted with glycerol. All observations were performed  
351 using the BX53 fluorescence microscope with a DP73 camera equipped with a suitable  
352 filter set (red filter with excitation range 530-550 nm and emission range 575 nm, and  
353 green filter with excitation range 470-495 nm and emission range of 510 nm).

354

### 355 **RNA-seq**

356 Total RNA was prepared using the RNeasy Mini Kit (Qiagen). RNA integrity was  
357 assessed with a 2100 Bioanalyzer (Agilent Technologies). Library preparation was



358 performed using a NEBNext Ultra II Directional RNA Library Prep Kit for Illumina  
359 (NEB) or a TruSeq stranded mRNA sample prep kit (Illumina) according to the  
360 manufacturer's instructions. Sequencing was performed on an Illumina NextSeq500 or  
361 NovaSeq6000 platform in 152- or 101-base single-end mode, respectively. Fastq files  
362 were generated using bcl2fastq2. Adapter sequences were trimmed from the raw reads  
363 by cutadapt ver 2.7. The trimmed reads were mapped to the human reference genome  
364 sequences (hg19) using HISAT2 ver 2.1.0. The raw counts were calculated using  
365 featureCounts ver 2.0.0 and used for heatmap visualization with integrated differential  
366 expression and pathway analysis (iDEP, (<http://ge-lab.org/idep/>))<sup>18</sup>. Access to raw data  
367 concerning this study was submitted under Gene Expression Omnibus (GEO) accession  
368 number GSE150819.

369

### 370 **LDH assay**

371 After the SARS-CoV-2 infection, the release of LDH was monitored from an  
372 aliquot of 250  $\mu$ L supernatant using the LDH-Glo cytotoxicity assay (Promega)  
373 according to the manufacturer's instructions. The absorbance was determined with a  
374 Bio-Rad microplate reader (Bio-Rad, US) at wavelength 490 nm. The release of LDH in  
375 uninfected cells was used as a control.

376

### 377 **Statistical analyses**

378 Statistical analysis was performed using the unpaired two-tailed Student's *t*-test.  
379 Statistical significance was evaluated by one-way analysis of variance (ANOVA)  
380 followed by Tukey's or Dunnett's post hoc tests to compare all groups.

381

382 **Acknowledgements**

383 The SARS-CoV-2 strain used in this study (SARS-CoV-2/Hu/DP/Kng/19-020)  
384 was obtained from Kanagawa Prefectural Institute of Public Health. This research was  
385 supported by the iPS Cell Research Fund. The figure 3A was created using Biorender  
386 (<https://biorender.com>). We thank Dr. Tomohiko Takasaki and Dr. Jun-Ichi Sakuragi  
387 (Kanagawa Prefectural Institute of Public Health) for providing SARS-CoV-2 strain  
388 (SARS-CoV-2/Hu/DP/Kng/19-020), Dr. Misaki Ouchida (Kyoto University) for  
389 creating graphical abstract, Dr. Peter Karagiannis (Kyoto University) for critical reading  
390 of the manuscript, Dr. Nobihiko Morone (University of Cambridge) for critical  
391 discussions, Ms. Sayaka Deguchi (Osaka University) for technical assistance with the  
392 qPCR analysis, and Ms. Kazusa Okita and Ms. Eri Kawaguchi for technical assistance  
393 with the RNA-seq experiments.

394

395 **Author Contributions**

396 TS performed the SARS-CoV-2 experiments and analyses  
397 YI performed the SARS-CoV-2 experiments and analyses  
398 YS performed the immunohistochemical analysis  
399 AS prepared the materials for the SARS-CoV-2 experiments and analyses  
400 DO performed the analysis of RNA-seq data of the infected bronchial organoids  
401 DM collected RNA-seq data of the infected bronchial organoids  
402 SM performed the SARS-CoV-2 experiments and analyses  
403 TK performed the SARS-CoV-2 experiments and analyses  
404 TY collected the RNA-seq data of the bronchial organoids  
405 TO designed the research and performed the SARS-CoV-2 experiments and analyses

406 KT designed the research, generated the bronchial organoids, performed statistical  
407 analysis, and wrote the paper

408

#### 409 **Declaration of interests**

410 The authors declare no competing financial interests.

411

#### 412 **References**

413

- 414 1 Lu, H., Stratton, C. W. & Tang, Y. W. Outbreak of Pneumonia of Unknown Etiology  
415 in Wuhan China: the Mystery and the Miracle. *Journal of Medical Virology*.
- 416 2 Whitworth, J. COVID-19: a fast evolving pandemic. *Transactions of The Royal  
417 Society of Tropical Medicine and Hygiene* (2020).
- 418 3 Hoffmann, M. *et al.* SARS-CoV-2 cell entry depends on ACE2 and TMPRSS2 and is  
419 blocked by a clinically proven protease inhibitor. *Cell* (2020).
- 420 4 van der Vaart, J. & Clevers, H. Airway organoids as models of human disease.  
421 *Journal of Internal Medicine* (2020).
- 422 5 Lukassen, S. *et al.* SARS - CoV - 2 receptor ACE2 and TMPRSS2 are primarily  
423 expressed in bronchial transient secretory cells. *The EMBO journal* (2020).
- 424 6 Zhu, N. *et al.* A novel coronavirus from patients with pneumonia in China, 2019.  
425 *New England Journal of Medicine* (2020).
- 426 7 Pizzorno, A. *et al.* Characterization and treatment of SARS-CoV-2 in nasal and  
427 bronchial human airway epithelia. *bioRxiv* (2020).
- 428 8 Han, Y. *et al.* Identification of Candidate COVID-19 Therapeutics using  
429 hPSC-derived Lung Organoids. *bioRxiv* (2020).
- 430 9 Wong, A. P. *et al.* Directed differentiation of human pluripotent stem cells into  
431 mature airway epithelia expressing functional CFTR protein. *Nature biotechnology*  
432 **30**, 876 (2012).
- 433 10 Firth, A. L. *et al.* Generation of multiciliated cells in functional airway epithelia  
434 from human induced pluripotent stem cells. *Proceedings of the National Academy of  
435 Sciences* **111**, E1723-E1730 (2014).
- 436 11 Sachs, N. *et al.* Long - term expanding human airway organoids for disease  
437 modeling. *The EMBO journal* **38** (2019).

- 438 12 Monteil, V. *et al.* Inhibition of SARS-CoV-2 infections in engineered human tissues  
439 using clinical-grade soluble human ACE2. *Cell* (2020).
- 440 13 Zhao, B. *et al.* Recapitulation of SARS-CoV-2 infection and cholangiocyte damage  
441 with human liver ductal organoids. *Protein & Cell*, 1-5 (2020).
- 442 14 Lamers, M. M. *et al.* SARS-CoV-2 productively infects human gut enterocytes.  
443 *Science* (2020).
- 444 15 Huh, D. *et al.* Reconstituting organ-level lung functions on a chip. *Science* **328**,  
445 1662-1668 (2010).
- 446 16 Si, L. *et al.* Human organs-on-chips as tools for repurposing approved drugs as  
447 potential influenza and COVID19 therapeutics in viral pandemics. *bioRxiv* (2020).
- 448 17 Matsuyama, S. *et al.* Enhanced isolation of SARS-CoV-2 by TMPRSS2-expressing  
449 cells. *Proceedings of the National Academy of Sciences* **117**, 7001-7003 (2020).
- 450 18 Ge, S. X., Son, E. W. & Yao, R. iDEP: an integrated web application for differential  
451 expression and pathway analysis of RNA-Seq data. *BMC bioinformatics* **19**, 534  
452 (2018).
- 453
- 454

**Figure 1**

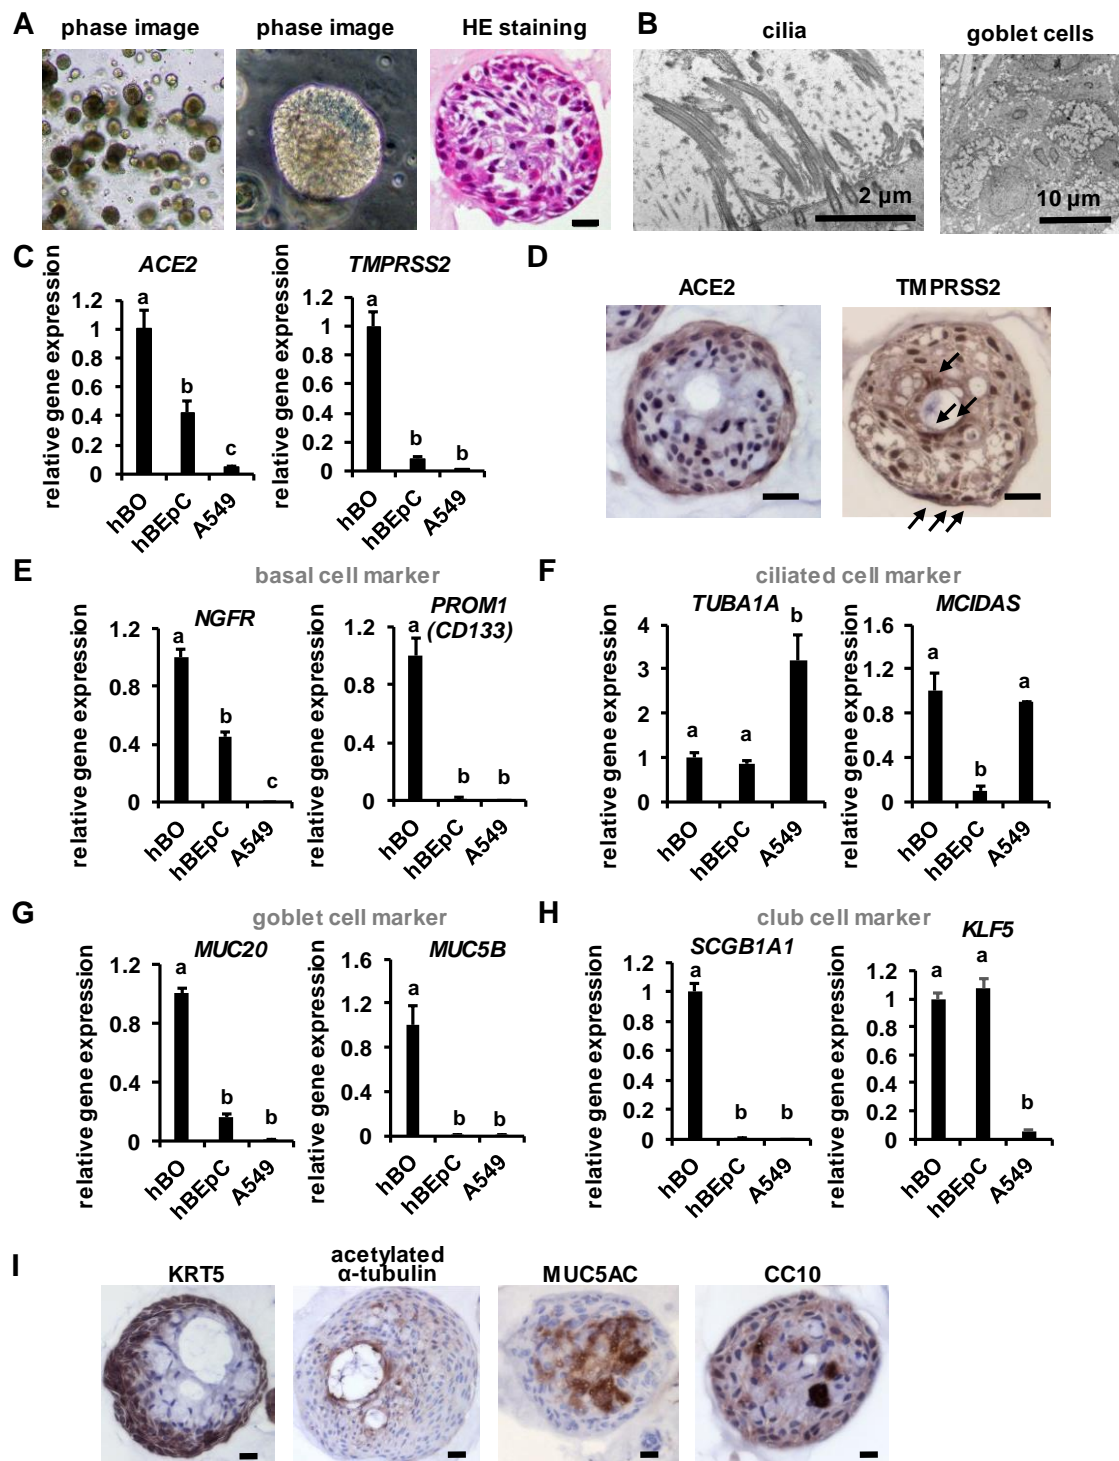

455

456 **Figure 1 Generation of human bronchial organoids**

457 (A) Phase and HE staining images of human bronchial organoids (hBO). Scale bar = 20

458  $\mu$ m. (B) A TEM image of hBO. Larger images are shown in Fig. S2. (C) The gene

459 expression levels of *ACE2* and *TMPRSS2* in hBO and hBEpC were examined by qPCR.  
460 The gene expression levels in hBO were normalized to 1.0. (D) The expressions of  
461 *ACE2* and *TMPRSS2* were examined by immunohistochemistry. Scale bar = 20  $\mu$ m.  
462 (E-H) The gene expression levels of basal (E), ciliated (F), goblet (G), and club (H) cell  
463 markers in hBO, hBEpC, and A549 cells were examined by qPCR. The gene expression  
464 levels in hBO were normalized to 1.0. (I) Immunohistochemistry analysis of KRT5  
465 (basal cell marker), acetylated  $\alpha$ -tubulin (ciliated cell marker), Mucin 5AC (goblet cell  
466 marker), and CC10 (club cell marker) in hBO. Scale bars = 20  $\mu$ m. All data are  
467 represented as means  $\pm$  SD ( $n = 3$ ). Statistical significance was evaluated by one-way  
468 ANOVA followed by Tukey's post-hoc tests. Groups that do not share the same letter  
469 are significantly different from each other ( $p < 0.05$ ).  
470

**Figure 2**

**A**

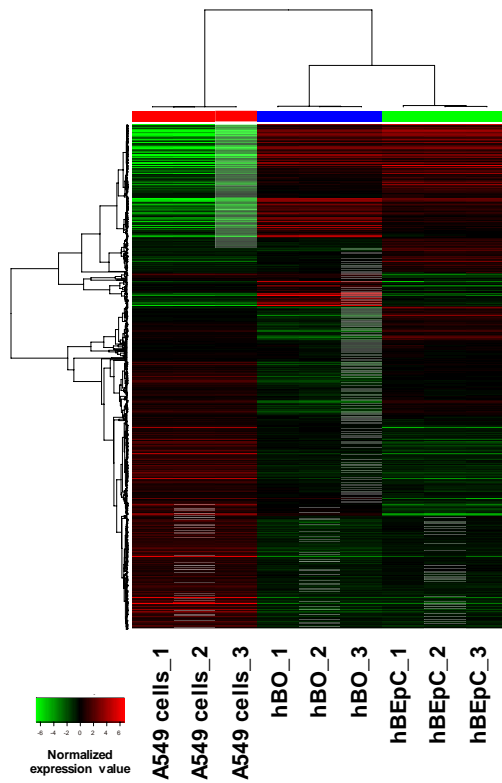

**B**

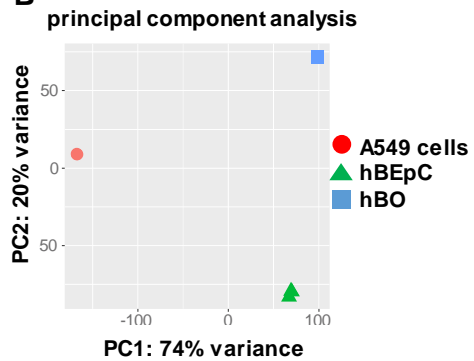

**D**

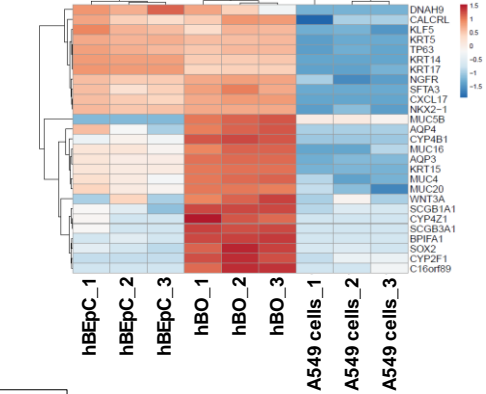

**C**

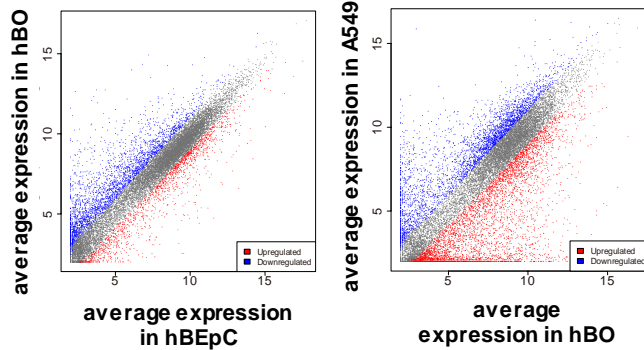

471

472 **Figure 2 Global gene expression profile of human bronchial organoids**

473 RNA seq analysis was performed in A549 cells (A549), human bronchial organoids

474 (hBO), and human bronchial epithelial cells (hBEpC). (A) Hierarchical clustering

475 analysis of 2,000 variable genes was performed. (B) Principal component analysis

476 (PCA) in “A549”, “hBO”, and “hBEpC”. (C) A scatter plot in “A549”, “hBO”, and

477 “hBEpC”. (D) A clustering analysis of bronchial markers was performed.

478



**Figure 3**

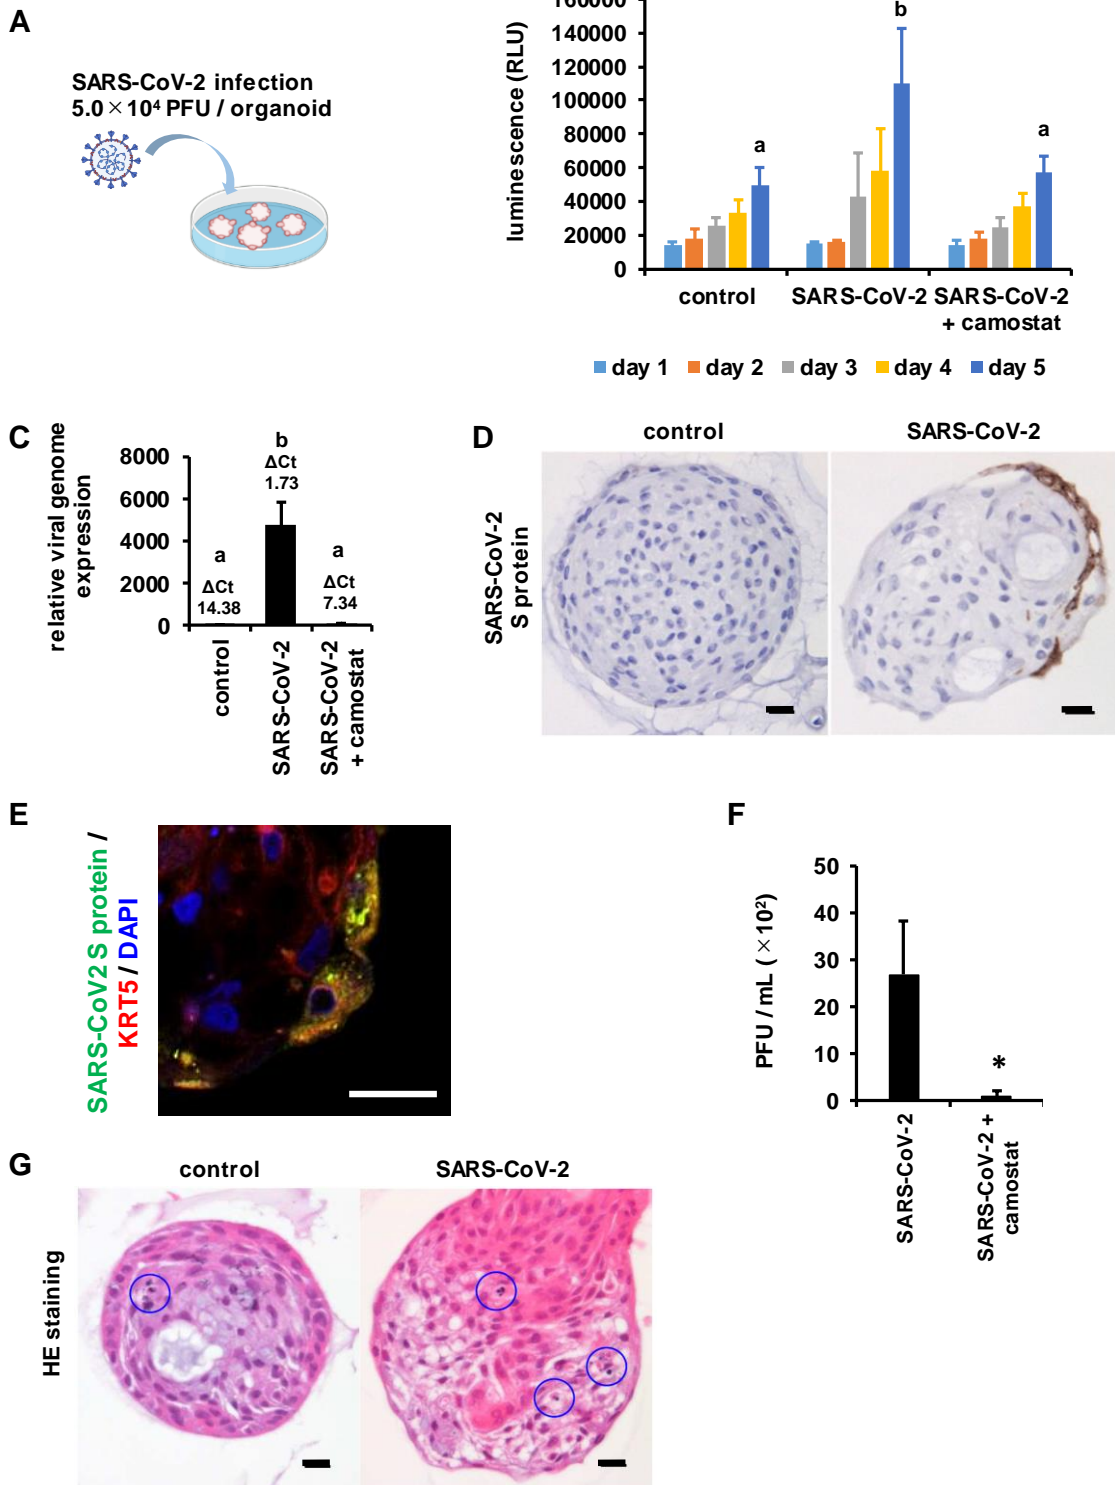

479

480 **Figure 3 SARS-CoV-2 infection experiments in human bronchial organoids**

481 (A) hBO were infected with SARS-CoV-2 ( $5.0 \times 10^4$  PFU/well) in the presence or

482 absence of 10  $\mu$ M camostat and then cultured with differentiation medium for 5 days.  
483 (B) At days 1, 2, 3, 4, and 5 after the infection, an LDH assay was performed. (C) The  
484 viral genome expression levels in uninfected organoids (control), infected organoids  
485 (SARS-CoV-2), and infected organoids treated with camostat (SARS-CoV-2 +  
486 camostat) were examined by qPCR. The gene expression levels in control were  
487 normalized to 1.0. Statistical significance was evaluated by one-way ANOVA followed  
488 by Tukey's post-hoc tests. Groups that do not share the same letter are significantly  
489 different from each other ( $p < 0.05$ ). (D) The expression of SARS-CoV-2 Spike protein  
490 was examined by immunohistochemistry. Scale bar = 20  $\mu$ m. (E) The expression of  
491 SARS-CoV-2 Spike protein and KRT5 was confirmed by immunofluorescence staining.  
492 Nuclei were counterstained with DAPI. Scale bar = 20  $\mu$ m. (F) The amount of infectious  
493 virus in the supernatant was measured. Statistical analysis was performed using the  
494 unpaired two-tailed Student's *t*-test (\*  $p < 0.05$ ). (G) HE staining images of uninfected  
495 organoids (control) and infected organoids (SARS-CoV-2) are shown. Blue circles show  
496 the existence of pyknotic cells. Scale bar = 20  $\mu$ m. All data are represented as means  $\pm$   
497 SD ( $n = 3$ ).  
498

**Figure 4**

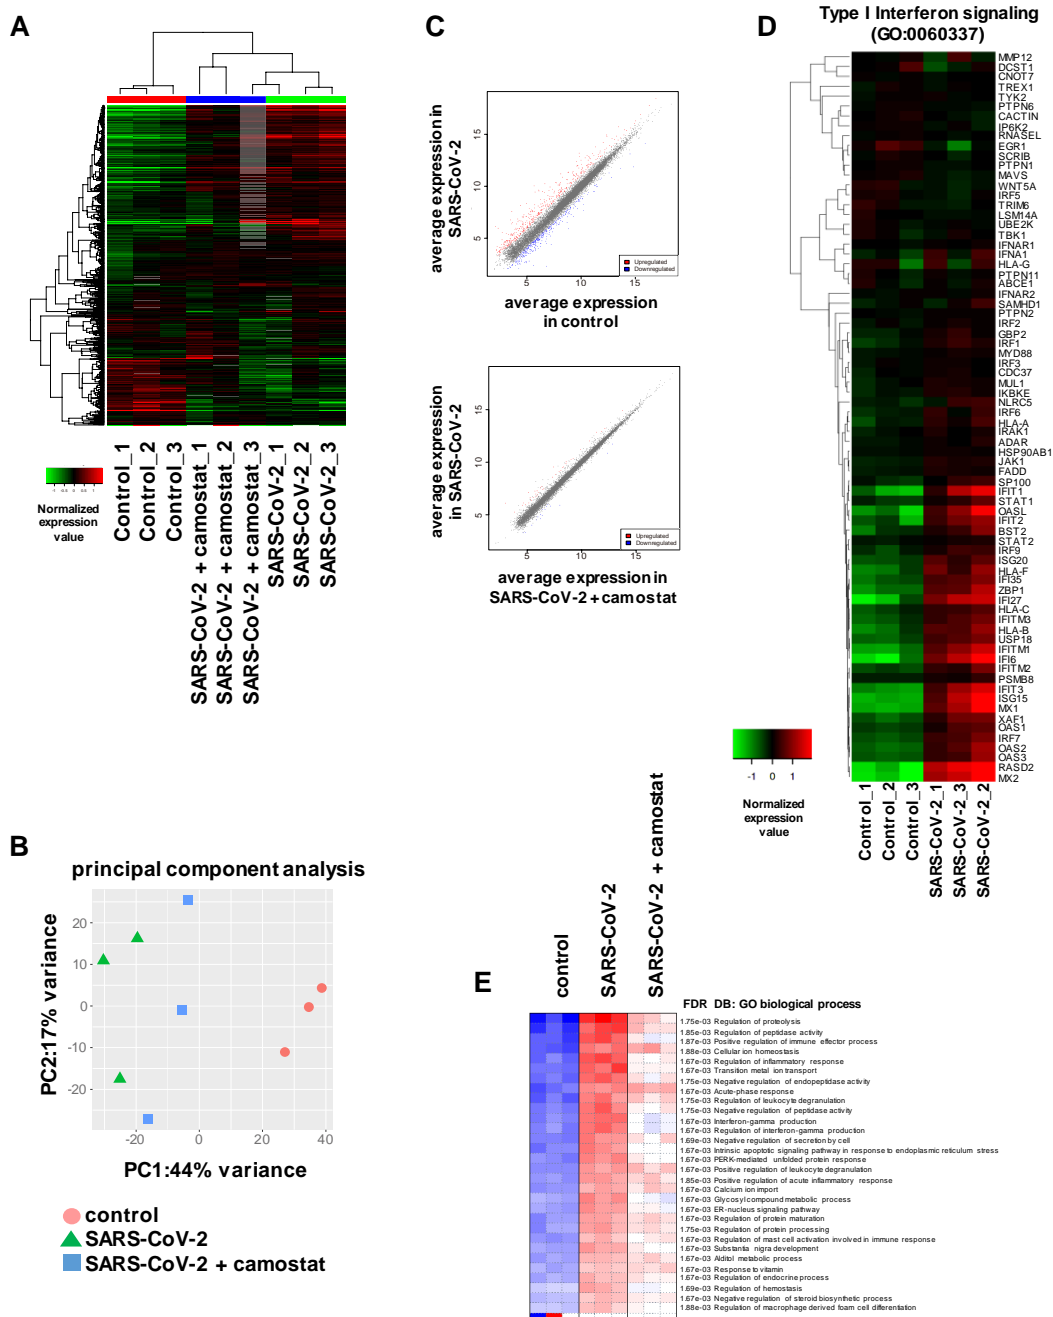

499

500 **Figure 4 Global gene expression profile of infected human bronchial organoids**

501 RNA seq analysis of uninfected hBO (control), SARS-CoV-2-infected hBO

502 (SARS-CoV-2), and SARS-CoV-2-infected hBO treated with camostat (SARS-CoV-2 +

503 camostat). (A) A clustering analysis of 2,000 variable genes was performed. (B)

504 Principal component analysis (PCA) in “control”, “SARS-CoV-2”, “SARS-CoV2 +  
505 camostat”. (C) A scatter plot in “control”, “SARS-CoV-2”, “SARS-CoV2 + camostat”.  
506 (D) A heat map of IFN-I signaling-related genes in “control” and “SARS-CoV-2” is  
507 shown. (E) PGSEA (Parametric Gene Set Enrichment Analysis) applied on GO  
508 biological process gene sets was performed.  
509

510 **Supplemental figures**

511

**Figure S1**

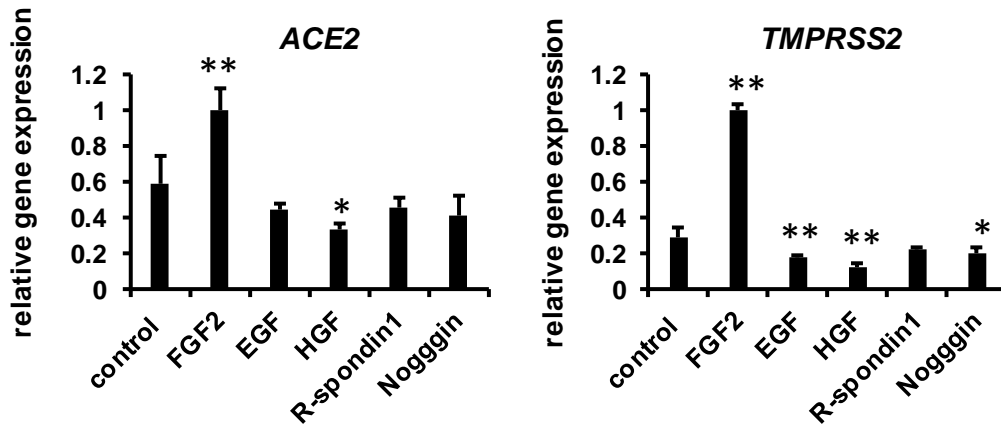

512

513 **Figure S1 FGF2 promotes the maturation of human bronchial organoids**

514 Expanded hBO were cultured with differentiation medium containing FGF2, EGF, HGF,  
515 R-spondin 1, or Noggin for 5 days. The gene expression levels of *ACE2* and *TMPRSS2*  
516 were examined by qPCR. The gene expression levels in “FGF2” were normalized to 1.0.  
517 All data are represented as means  $\pm$  SD ( $n = 3$ ). Statistical significance was evaluated by  
518 one-way ANOVA followed by Dunnett’s post-hoc tests (\*  $p < 0.05$ , \*\*  $p < 0.01$ , as  
519 compared with control).

520

**Figure S2**

**human bronchial organoids**

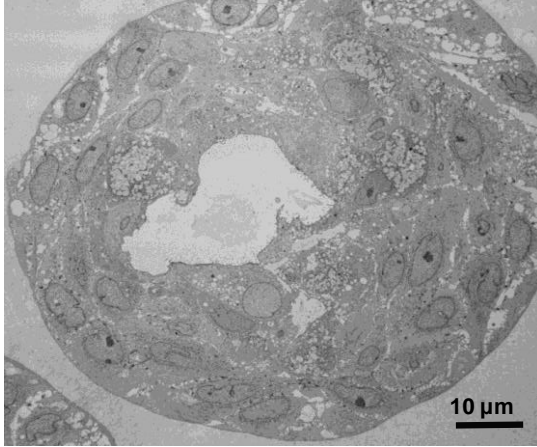

**goblet cells**

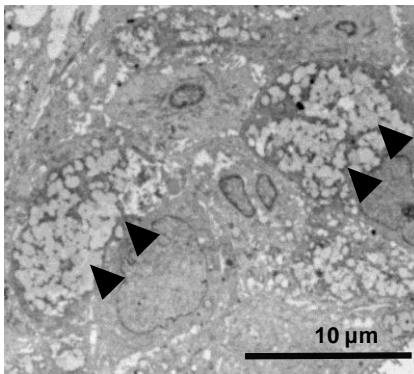

**basal cells**

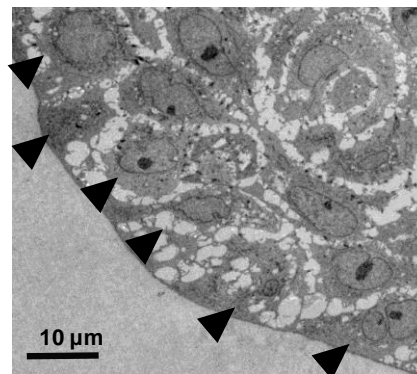

**9 + 2 arrangement**

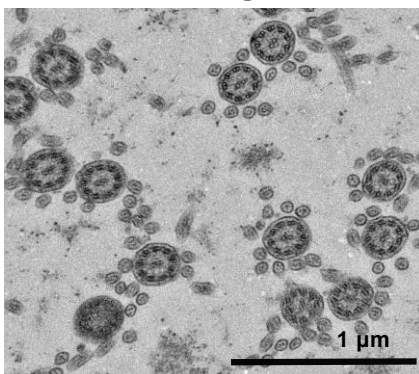

**cilia and microvilli**

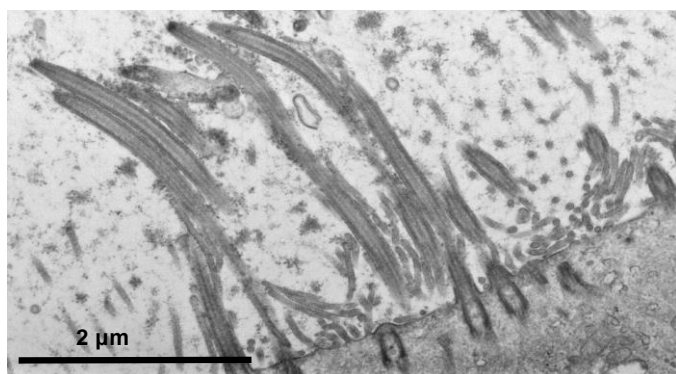

521

522 **Figure S2 TEM image of human bronchial organoids**

523 The larger TEM images of Fig. 1B are shown. Goblet cells, basal cells, 9+2

524 arrangement, cilia, and microvilli can be observed in hBO.

525

### Figure S3

ACE2 / KRT5 / DAPI

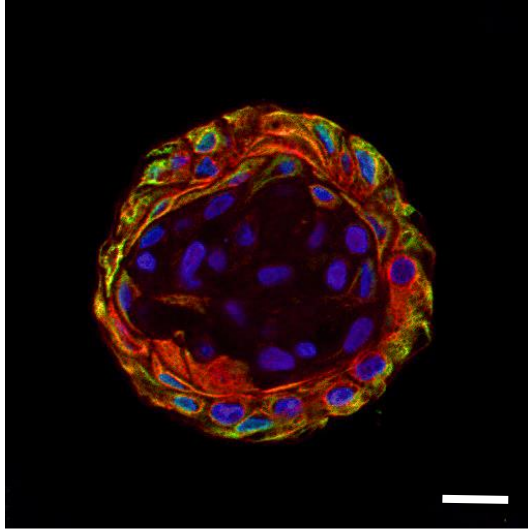

526

527 **Figure S3 ACE2 is expressed in basal cells**

528 The expression of ACE2 and KRT5 (basal cell marker) in hBO was confirmed by  
529 immunofluorescence staining. Nuclei were counterstained with DAPI. Scale bar = 20

530  $\mu\text{m}$ .

531

## Figure S4

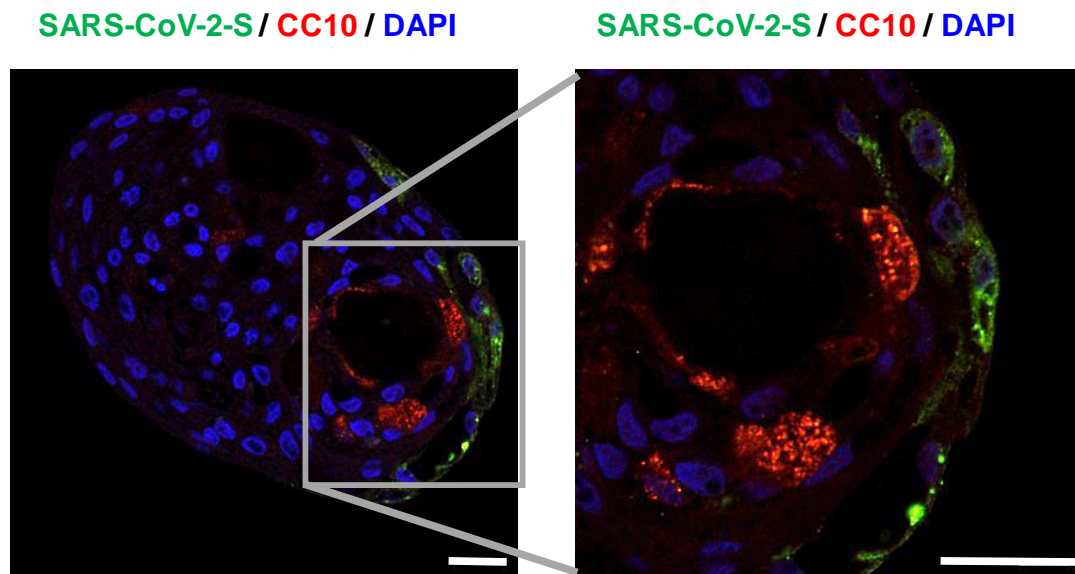

532

533 **Figure S4 SARS-CoV-2 Spike protein is not expressed in club cells**

534 hBO were infected with SARS-CoV-2 ( $5.0 \times 10^4$  PFU/well) and then cultured with

535 differentiation medium for 5 days. The expression of SARS-CoV-2 Spike protein and

536 CC10 was confirmed by immunofluorescence staining. Nuclei were counterstained with

537 DAPI. Scale bar = 20  $\mu$ m.

538



Figure S5

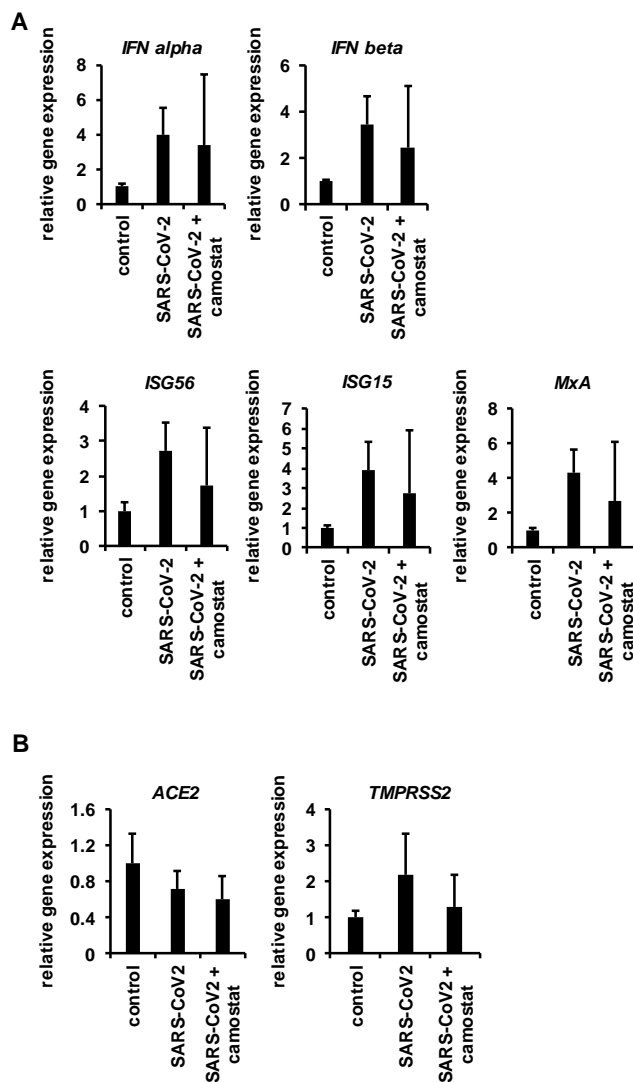

539

540 **Figure S5 SARS-CoV-2-induced innate immune responses in human bronchial**  
541 **organoids**

542 hBO were infected with SARS-CoV-2 ( $5.0 \times 10^4$  PFU/well) in the presence or absence of  
543 10  $\mu$ M camostat and then cultured with differentiation medium for 5 days. (A, B) The  
544 gene expression levels of type I interferon (*IFN alpha* and *IFN beta*),  
545 interferon-stimulated genes (*ISG56*, *ISG15*, and *MxA*) (A), and SARS-CoV-2-associated  
546 genes (*ACE2* and *TMPRSS2*) (B) in uninfected organoids (control), infected organoids  
547 (SARS-CoV-2), and infected organoids treated with camostat (SARS-CoV-2 +  
548 camostat) were examined by qPCR. The gene expression levels in control were  
549 normalized to 1.0. All data are represented as means  $\pm$  SD ( $n = 3$ ).

550

551

552 **Tables**

553

554 **Table S1 Composition of expansion and differentiation media for human**

555 **bronchial organoids**

| <b>Composition (concentration)</b>           | <b>Expansion medium</b> | <b>Differentiation medium</b> |
|----------------------------------------------|-------------------------|-------------------------------|
| <b>Advanced DMEM/F12</b>                     | +                       | +                             |
| <b>FGF2 (5 ng/ml)</b>                        | +                       | +                             |
| <b>FGF7 (20 ng/ml)</b>                       | +                       | +                             |
| <b>FGF10 (100 ng/ml)</b>                     | +                       | +                             |
| <b>Noggin (100 ng/ml)</b>                    | +                       | –                             |
| <b>R-spondin 1 (300 ng/ml)</b>               | +                       | –                             |
| <b>Y-27632 (10 <math>\mu</math>M)</b>        | +                       | +                             |
| <b>SB202190 (100 <math>\mu</math>M)</b>      | +                       | –                             |
| <b>A83-01 (1 <math>\mu</math>M)</b>          | –                       | +                             |
| <b>B27 supplement (1<math>\times</math>)</b> | +                       | +                             |
| <b>N-Acetylcysteine (1.25 mM)</b>            | +                       | +                             |
| <b>Nicotinamide (5 mM)</b>                   | +                       | +                             |
| <b>GlutaMAX (1<math>\times</math>)</b>       | +                       | +                             |
| <b>HEPES (10 mM)</b>                         | +                       | +                             |
| <b>Penicillin-Streptomycin (100 U/ml)</b>    | +                       | +                             |
| <b>Primocin (50<math>\mu</math>g)</b>        | +                       | +                             |

556

557

558 **Table S2 Primer list**

| target gene | Fwd primer              | Rev primer              |
|-------------|-------------------------|-------------------------|
| ACE2        | ACAGTCCACACTTGCCCAAAT   | TGAGAGCACTGAAGACCCATT   |
| GAPDH       | GGTGGTCTCCTCTGACTTCAACA | GTGGTCGTTGAGGGCAATG     |
| IFN alpha   | GCAGATCACCCAGAAGATCG    | GGCCCTTGTTATTCTCACC     |
| IFN beta    | CCTTGCTGAAGTGTGGAGGA    | CCAGGCGATAGGCAGAGA      |
| ISG15       | GCAGATCACCCAGAAGATCG    | GGCCCTTGTTATTCTCACC     |
| ISG56       | CCTTGCTGAAGTGTGGAGGA    | CCAGGCGATAGGCAGAGA      |
| KRT5        | CCAAGGTTGATGCACTGATGG   | TGTCAGAGACATGCGTCTGC    |
| MCIDAS      | ATTCCCACCAAACGGAAGCAG   | CCAGGGTAGGCGACATCATAG   |
| MUC20       | ATGACAACGGACGACACAGAA   | TCAGCGTTTGAGTTTCCAGAG   |
| MUC5B       | GCCTACGAGGACTTCAACGTC   | CCTTGATGACAACACGGGTGA   |
| MxA         | CTTATCCGTTAGCCGTGGTG    | CAAGGTGGAGCGATTCTGAG    |
| NGFR        | CCTACGGCTACTACCAGGATG   | CACACGGTGTCTGCTTGT      |
| PROM1       | GGCCAGTACAACACTACCAA    | ATTCCGCCTCTAGCACTGAA    |
| SCGB1A      | TTCAGCGTGTCATCGAAACCC   | ACAGTGAGCTTTGGGCTATTTTT |
| TMPRSS2     | GTCCCCACTGTCTACGAGGT    | CAGACGACGGGGTTGGAAG     |
| TUBA1A      | TCGATATTGAGCGTCCAACCT   | CAAAGGCACGTTTGGCATAACA  |

559

560 **Table S3 Antibody list**

| Antigen (clone number)                                | catalog number     | company                  |
|-------------------------------------------------------|--------------------|--------------------------|
| ACE2                                                  | PGI-21115-1-AP-150 | Proteintech              |
| acetylated $\alpha$ tubulin (6-11B-1)                 | sc-23950           | Santa Cruz Biotechnology |
| CC10 (E-11)                                           | sc-365992          | Santa Cruz Biotechnology |
| cytokeratin 5 (RCK103)                                | sc-32721           | Santa Cruz Biotechnology |
| mucin 5AC (45M1)                                      | sc-21701           | Santa Cruz Biotechnology |
| SARS-CoV/SARS-CoV-2 (COVID-19)<br>spike protein (1A9) | GTX632604          | GeneTex                  |
| TMPRSS2 (H-4)                                         | sc-515727          | Santa Cruz Biotechnology |

561

562
